# Supplementary material
Source: PubMed Central journal article supplement (PMC3063711)
Supplement: NIHMS279756-supplement-01.pdf [file NIHMS279756-supplement-01.pdf]

Cell Stem Cell, Volume 8

## **Supplemental Information**

# **Targeting *SOX17* in Human Embryonic Stem Cells Creates Unique Strategies for Isolating and Analyzing Developing Endoderm**

Pei Wang, Ryan T. Rodriguez, Jing Wang, Amar Ghodasara, and Seung K. Kim

### **Inventory of Supplemental Information**

Figure S1, related to Figure 1, with legend

Figure S2, related to Figure 2, with legend

Figure S3, related to Figure 3, with legend

Figure S4, related to Figure 4, with legend

Figure S5, related to Figure 5, with legend

Figure S6, related to Figure 6, with legend

Figure S7, related to Figure 7, with legend

Table S1

Table S2 (available online)

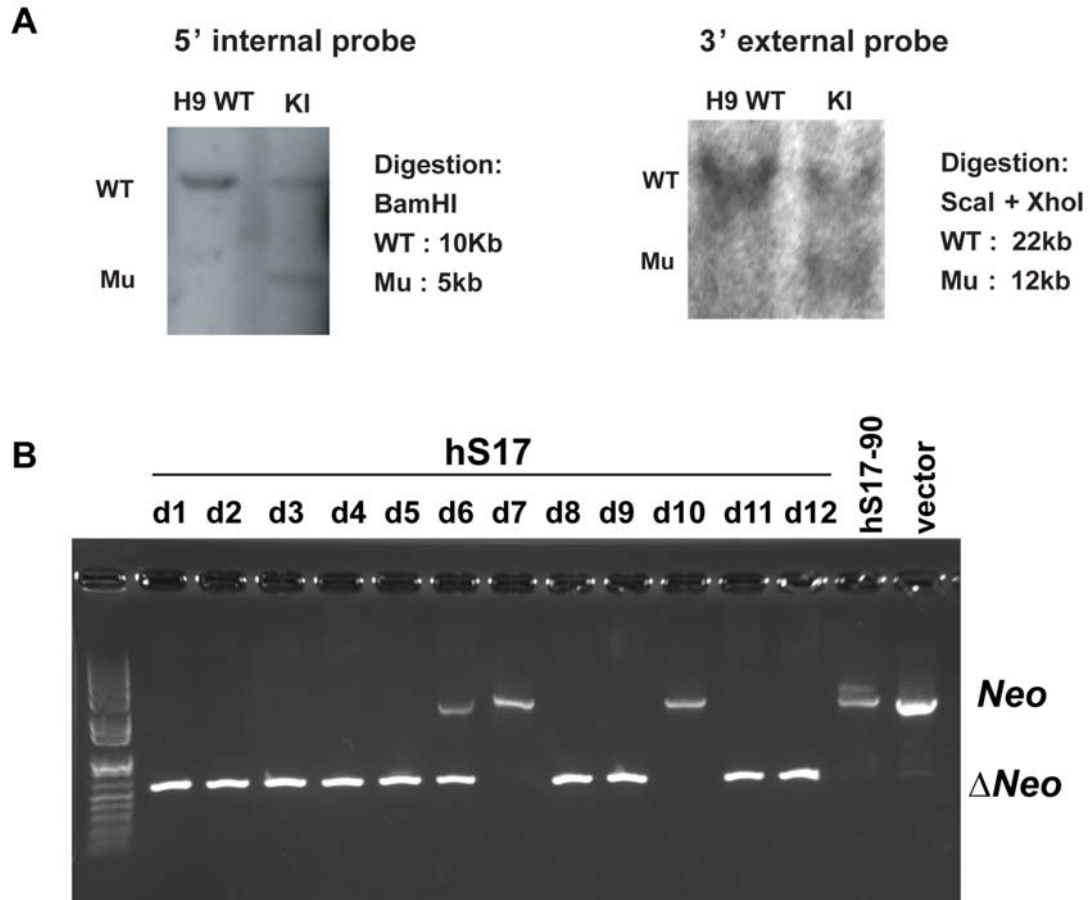

Figure S1, related to Figure 1. Characterization of hS17 hESC lines. (A) Southern blot confirmed targeting of the eGFP-encoding transgene to the endogenous *SOX17* locus in hS17-90 hESC. (B) PCR genotyping showed successfully deleted Neo cassette in clone 1, 2, 3, 4, 5, 8, 9, 11 and 12. Primers used here were 5'-GCATCATAATCAGCCATACC-3' and 5'-AAACTGTTCAAGTGGC AGAC-3'.

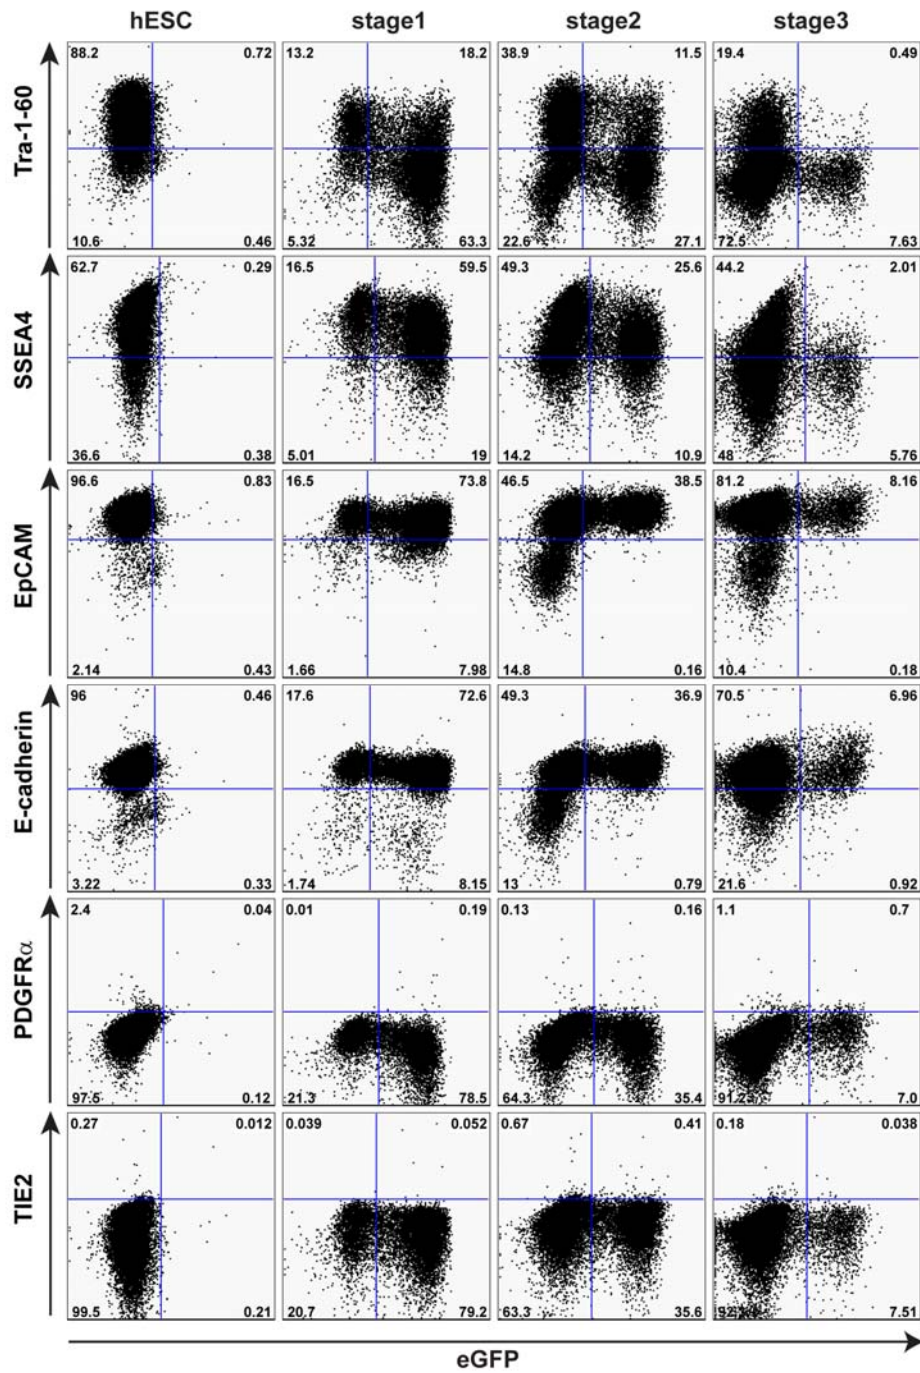

Figure S2, related to Figure 2. Flow cytometry analysis of cell surface markers of hS17-d2 hESC line during in vitro endoderm differentiation. Pluripotent markers Tra-1-60 and SSEA4, were downregulated after hS17-d2 ESC differentiation. EpCAM and E-cadherin were expressed highly in undifferentiated hESCs and SOX17-eGFP<sup>+</sup> cells. PDGFR $\alpha$  and TIE2 were not induced during endoderm differentiation.

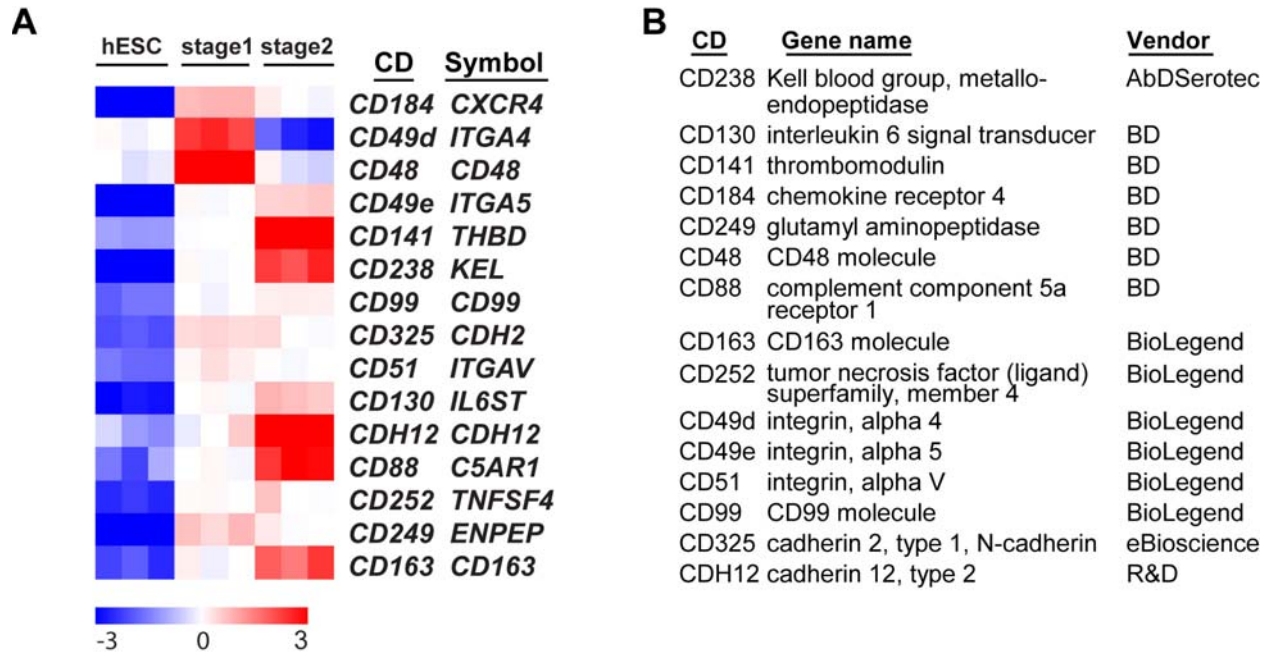

Figure S3, related to Figure 3. Gene expression analysis of hESCs and endoderm derivatives. (A) 15 surface proteins were highly expressed in hESC-derived stage 1 and stage 2 endoderm. (B) Vendors for antibodies to 15 cell surface proteins.

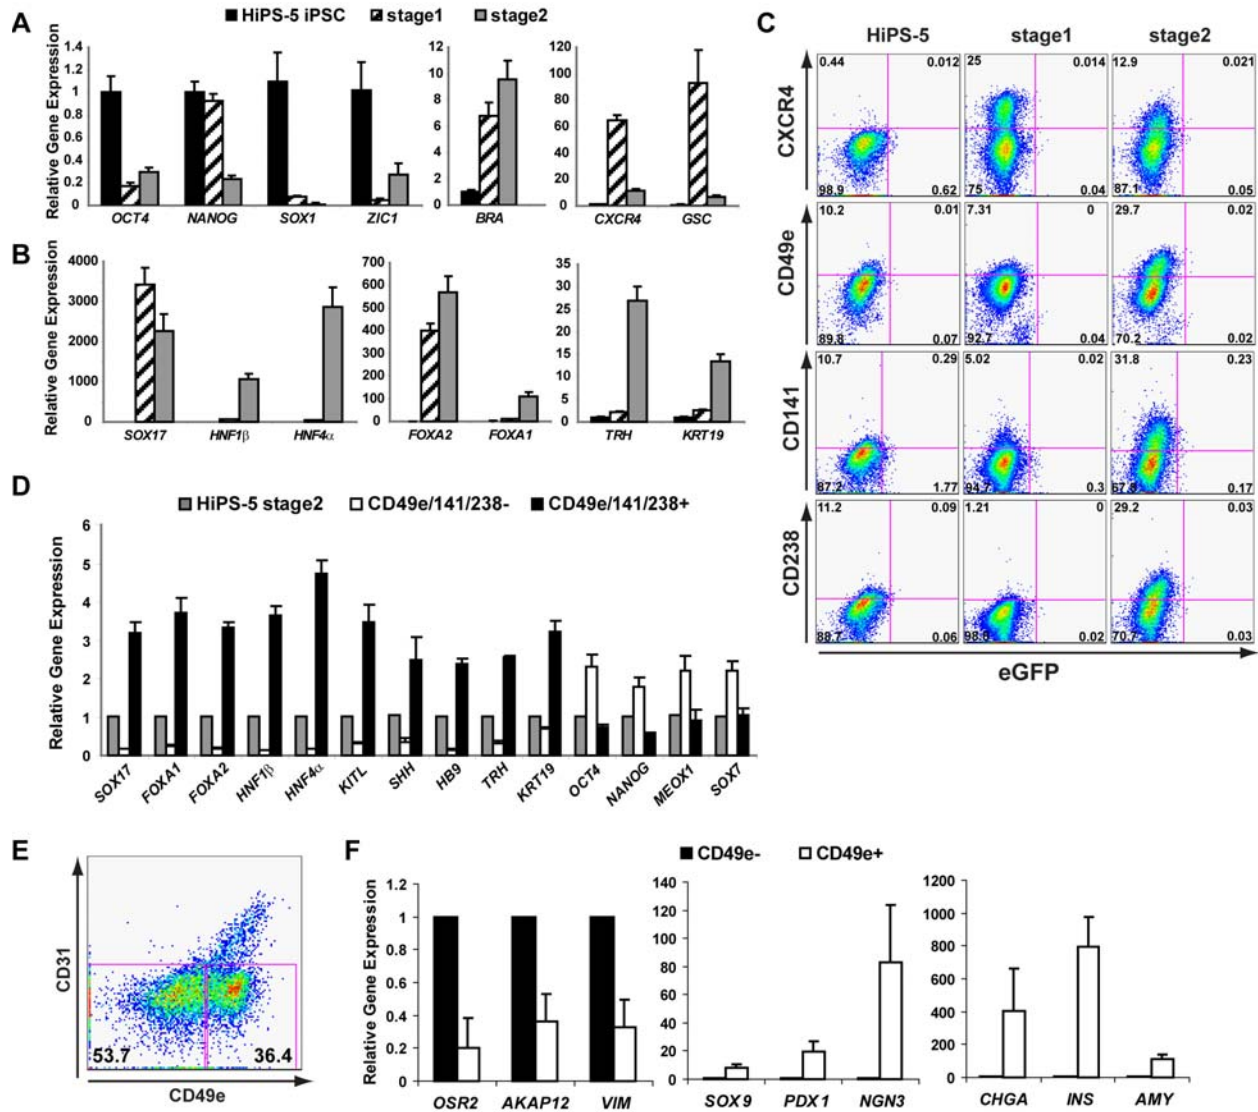

Figure S4, related to Figure 4. iPSC line HiPSC-5 differentiated towards endodermal lineage was similar to hESCs. (A). Pluripotent markers were downregulated during differentiation and mesodermal markers were induced in stages 1 and 2 (mean  $\pm$  SEM,  $n=3$ ). (B). Endodermal markers were greatly induced at stages 1 and 2 (mean  $\pm$  SEM,  $n=3$ ). (C). Flow cytometry analysis of CXCR4, CD49e, CD141 and CD238 during HiPSC-5 differentiation. (D). Gene expression analysis showed that endoderm markers were highly enriched in CD49e/CD141/CD238 positive cells; the expression of *OCT4*, *NANOG*, *MEOX1* and *SOX7* were higher in CD49e/CD141/CD238 negative cells (mean  $\pm$  SEM,  $n=3$ ), similar to hESCs. (E) FACS isolation of endoderm derivative from human fetal pancreas. Human fetal pancreas was separated into two fractions, CD49e<sup>+</sup> and CD49e<sup>-</sup> using a CD49e antibody. (F) Mesenchymal markers were expressed higher in CD49e<sup>-</sup> cells, while the pancreatic marker genes were enriched in CD49e<sup>+</sup> cells (mean  $\pm$  SEM,  $n=3$ ).

### A Neuroectoderm Differentiation

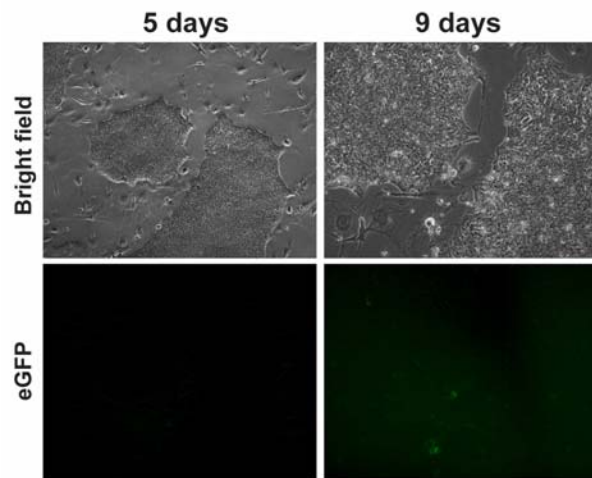

### B Mesoderm Differentiation

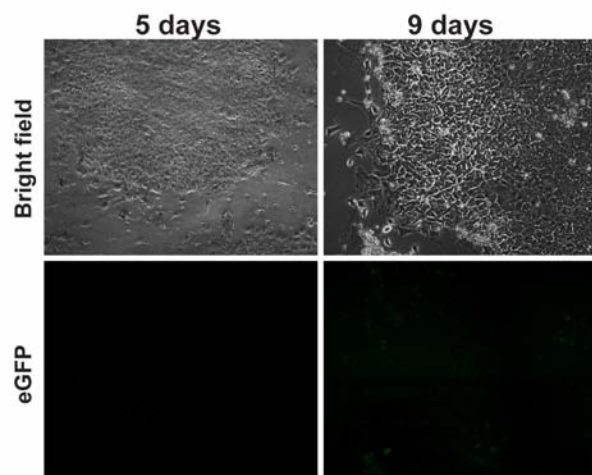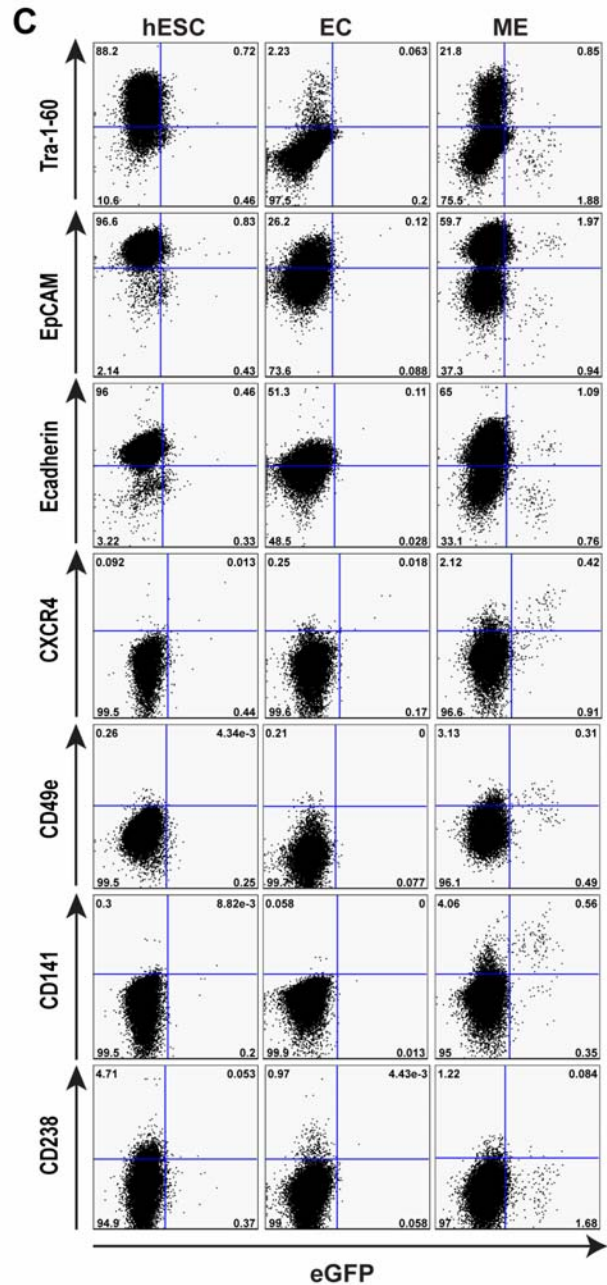

Figure S5, related to Figure 5. Analysis of the differentiation potential of stage 2 cells using neuroectoderm and mesoderm protocols. (A). hESCs did not express eGFP when differentiated using neuroectoderm protocol. (B). hESCs did not express eGFP when differentiated using mesoderm protocol. (C). Flow cytometry analysis of hESCs differentiated for 9 days using neuroectoderm protocol (NE) or mesoderm protocol (ME). CXCR4, CD49e, CD141 and CD238 were negative/low in NE and ME.

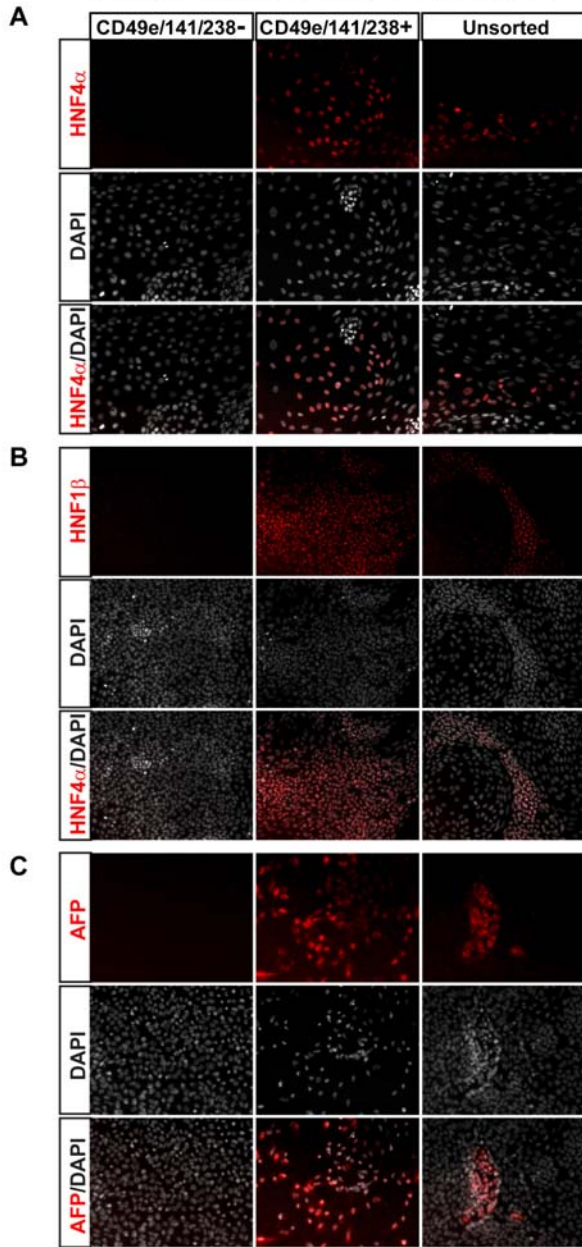

Figure S6, related to Figure 6. Analysis of endoderm potential of FACS isolated endoderm derived from hESCs using D'Amour protocol from stage 2 to stage 4. Immunostaining of (A). HNF1 $\beta$ , (B). HNF4 $\alpha$  and (C). AFP on stage 4 cells differentiated from unsorted and sorted stage 2 cells. All markers had no expression in CD49e/CD141/CD238 negative cells but were expressed in CD49e/CD141/CD238 positive cells.

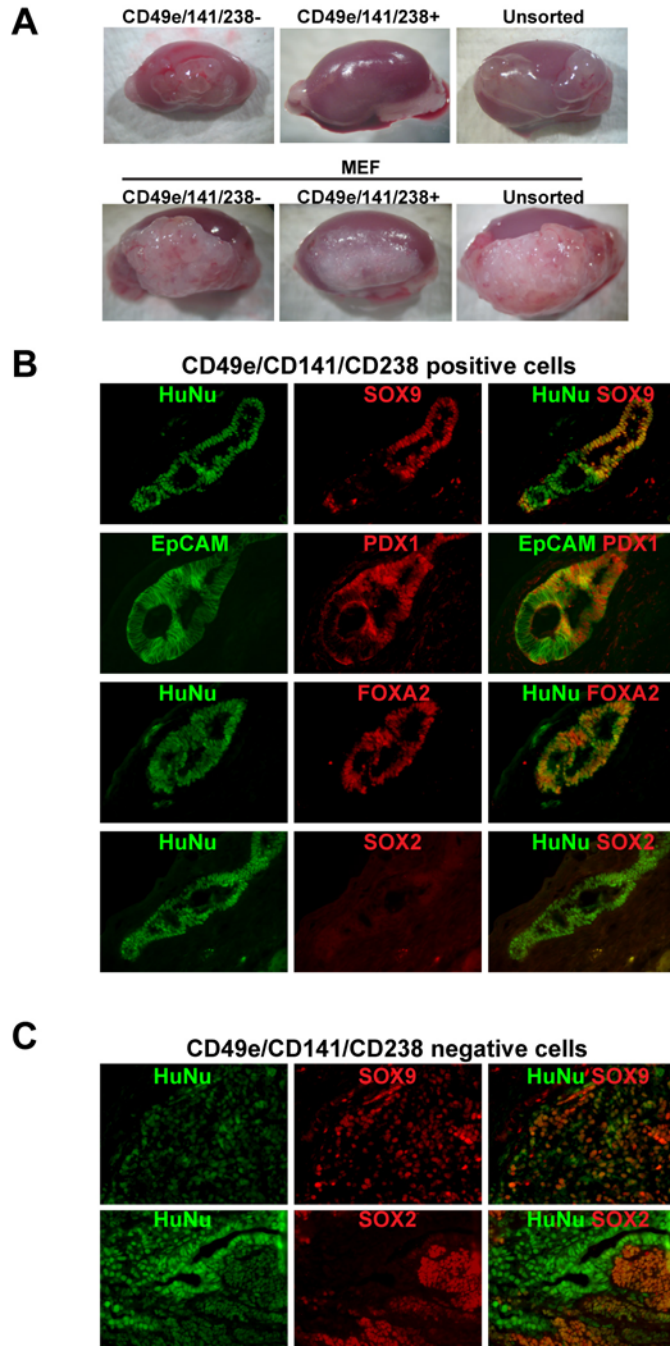

Figure S7, related to Figure 7. Transplantation-based analysis of developmental potential in isolated hESC derived endoderm. (A). Engraftments of transplantations of unsorted and sorted cells with or without MEF showed different growth. (B) CD49/141/238 positive cells co-transplanted with MEF differentiated into tissues that expressed markers of endodermal lineage. (C) CD49/141/238 negative cells co-transplanted with MEF differentiated into teratoma that expressed markers of ectoderm, mesoderm and endoderm lineages.



**Table S1. Q-PCR assays and antibodies used in the study.**

| Gene             | ABI Assay     | Antibody                                              | Catalog #                    | Vendor                                |
|------------------|---------------|-------------------------------------------------------|------------------------------|---------------------------------------|
| ACTIN            | Hs99999903_m1 | MOUSE ANTI HUMAN CD238                                | MCA1987T                     | AbDSerotec                            |
| AFP              | Hs00173490_m1 | CD184 (CXCR4, Fusin)-biotin                           | 551968                       | BD                                    |
| AKAP12           | Hs00374507_m1 | CD141                                                 | 559780                       | BD                                    |
| ALB              | Hs00609411_m1 | CD141-PE                                              | 559781                       | BD                                    |
| AMY2B            | Hs00949916_m1 | Alexa Fluor® 647 anti-mouse CD31                      | 102415                       | biolegend                             |
| BRA              | Hs00610080_m1 | APC anti-human CD326 (EpCAM)                          | 324207                       | biolegend                             |
| CDX2             | Hs00230919_m1 | APC anti-human CD184 (CXCR4)                          | 306509                       | biolegend                             |
| CEBPa            | Hs00269972_s1 | PE anti-human SSEA-4                                  | 330405                       | biolegend                             |
| CHGA             | Hs00154441_m1 | Alexa Fluor® 647 Anti-human CD31 Antibody             | 303111                       | biolegend                             |
| FOXA1            | Hs00270129_m1 | Biotin Anti-human CD49e Antibody                      | 328005                       | biolegend                             |
| FOXA2            | Hs00232764_m1 | Biotin Anti-human TRA-1-60-R Antibody                 | 330603                       | biolegend                             |
| GSC              | Hs00418279_m1 | Biotin Anti-human TRA-1-81 Antibody                   | 330703                       | biolegend                             |
| HB9              | Hs00232128_m1 | Biotin Anti-mouse CD326 (Ep-CAM) Antibody             | 118204                       | biolegend                             |
| HNF1b            | Hs01001602_m1 | Streptavidin-PE/Cy7                                   | 405206                       | biolegend                             |
| HNF4a            | Hs01023298_m1 | PE Anti-human CD202b (Tie2/Tek) Antibody              | 334205                       | biolegend                             |
| INS              | Hs00355773_m1 | APC Anti-human CD324 (E-Cadherin) Antibody            | 324107                       | biolegend                             |
| ITGA5<br>(CD49e) | Hs01547673_m1 | Biotin Anti-human CD140a (PDGFR $\alpha$ ) Antibody   | 328011                       | biolegend                             |
| KDR              | Hs00176676_m1 | Human Kell Affinity Purified Ab, Goat IgG             | 323503                       | biolegend                             |
| KEL (CD238)      | Hs00166270_m1 | Anti-human SOX17 Antibody                             | AF1914                       | R&D                                   |
| KITLG            | Hs00241497_m1 | Qdot® 605 streptavidin conjugate                      | AF1924                       | R&D                                   |
| KRT19            | Hs00761767_s1 | Alexa Fluor® 633 donkey anti-goat IgG (H+L)           | Q10101MP<br>SKU# A-<br>21082 | invitrogen                            |
| MEOX1            | Hs00244943_m1 | Donkey Anti-Goat IgG (bio)                            | 705-065-147                  | invitrogen<br>Jackson<br>Immuno       |
| MIX11            | Hs00430824_g1 | Purified Anti-human CD49e Antibody                    | 328002                       | biolegend                             |
| NANOG            | Hs02387400_g1 | Rabbit Monoclonal, Clone: EP700Y, E-cadherin          | 246R-14                      | Cell marque                           |
| NEUROG3          | Hs00360700_g1 | Mouse Monoclonal, Clone: V9, VIMENTIN                 | 347M-14                      | Cell marque                           |
| OCT4             | Hs01895061_u1 | Rabbit Monoclonal, Clone: EPR2764Y, CDX2              | 235R-14                      | Cell marque                           |
| OSR2             | Hs00369588_m1 | Neuronal Class III $\beta$ -Tubulin (TUJ1) Antibody   | MMS-435P-<br>100             | Convance                              |
| PAX6             | Hs00240871_m1 | Chromagranin A                                        | 20085                        | ImmunoStar                            |
| PDX1             | Hs00236830_m1 | Anti-GFP, rabbit IgG fraction                         | A-11122                      | invitrogen                            |
| SHH              | Hs00179843_m1 | Chicken anti-GFP                                      | ab13970                      | Abcam                                 |
| SOX1             | Hs00534426_s1 | Rabbit anti-FOXA2                                     | AB4125                       | Millipore                             |
| SOX17            | Hs00751752_s1 | Human nuclear antigen                                 | MAB1281                      | Millipore                             |
| SOX7             | Hs00846731_s1 | Goat anti-HNF1b                                       | SC-7411                      | santa cruz                            |
| SOX9             | Hs00165814_m1 | Rabbit anti-HNF4a                                     | SC-8987                      | santa cruz                            |
| THBD<br>(CD141)  | Hs00264920_s1 | goat anti-SOX2                                        | SC-17320                     | santa cruz                            |
| TRH              | Hs00175078_m1 | Monoclonal Anti- $\alpha$ -Fetoprotein (AFP) antibody | A8452-.2ML                   | sigma                                 |
| VIMENTIN         | Hs00958116_m1 | Monoclonal Anti-Albumin antibody                      | A6684-.2ML                   | sigma                                 |
| ZIC1             | Hs00602749_m1 | Rabbit anti-PDX1                                      |                              | Gift of Edlund lab Umea<br>University |
